# Supplementary material for: CO2 electroreduction to fuels on mesoporous carbon-embedded copper nanoparticles
Source: Royal Society of Chemistry journal article supplement (doi:10.1039/d0se01025a), 2020-01-01
Supplement: d0se01025a1.pdf [file d0se01025a1.pdf]

## Electronic Supporting Information

### **CO<sub>2</sub> electroreduction to fuels on mesoporous carbon-embedded copper nanoparticles**

Nihat Sahin,<sup>a,b</sup> Wanderson O. Silva,<sup>b</sup> Mariana R. Camilo,<sup>b</sup> Edson A. Ticianelli,<sup>b</sup> Fabio H. B. Lima,<sup>b</sup> Julien Parmentier,<sup>c</sup> Clément Comminges,<sup>a</sup> Teko W. Napporn,<sup>a</sup> and Kouakou B. Kokoh<sup>a,\*</sup>

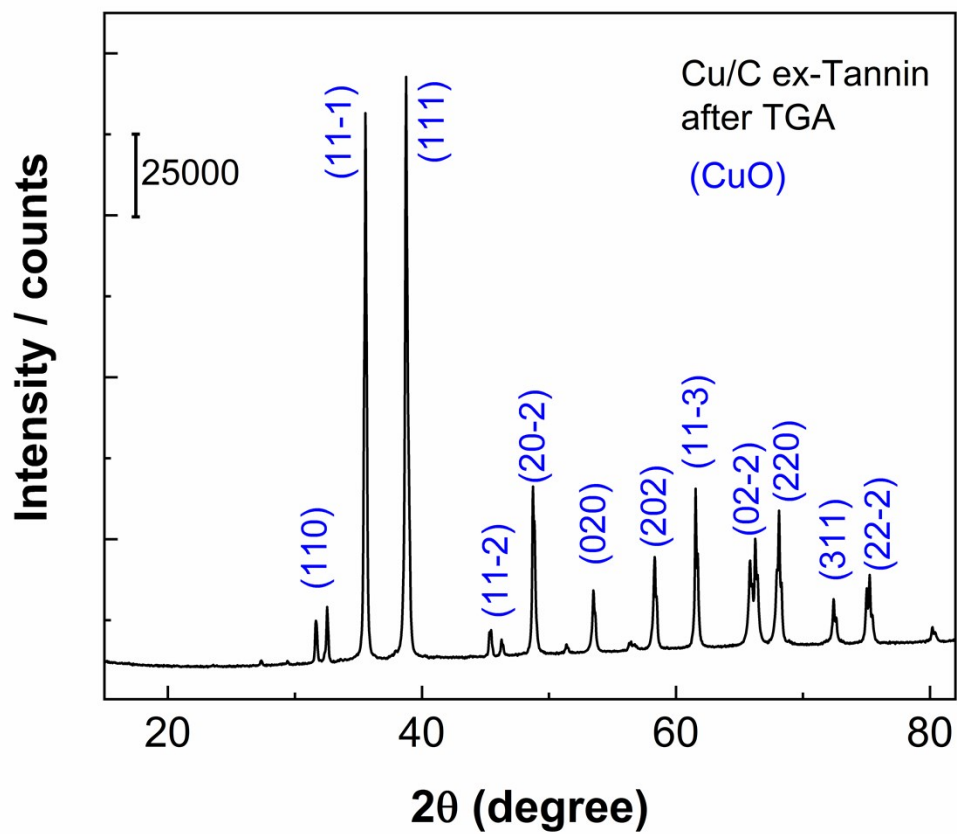

**Figure S1.** XRD patterns of the Cu/C ex-Tannin material recorded after the thermogravimetric analysis measurement under air atmosphere.

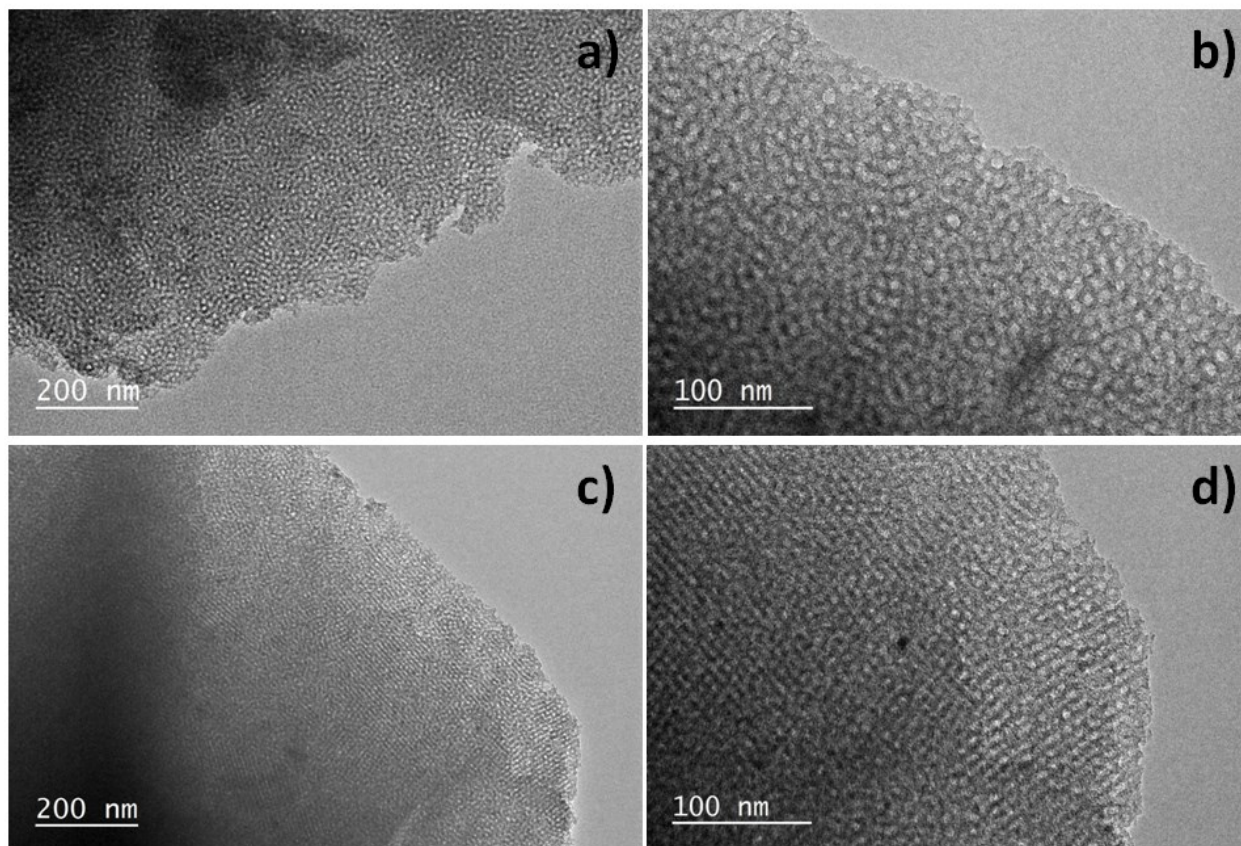

**Figure S2.** Transmission electron microscopy (TEM) images of the metal-free mesoporous carbon materials at different carbonization temperatures (a, b at 400 °C) and (c, d at 900 °C) under Ar for 18 min.

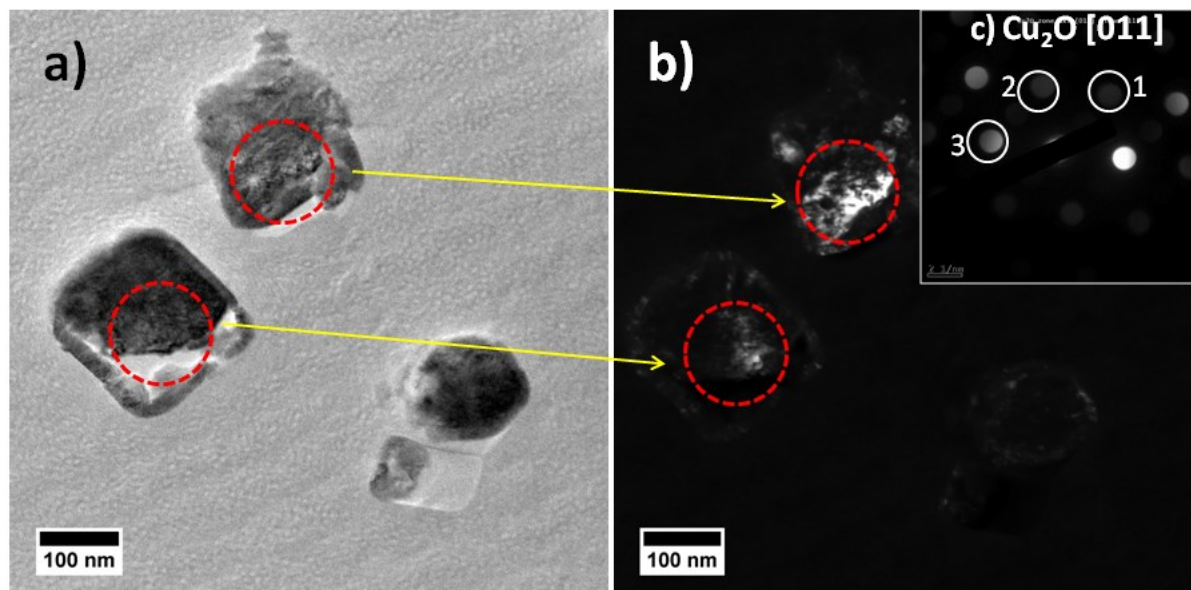

**Figure S3.** The cross-section TEM (CS-TEM) micrographs of Cu/Tannin (a) bright field, (b) dark field CS-TEM micrographs, and the inset image (c) the inset image the selected area electron diffraction (SAED) pattern as regards the dark field plane of  $\text{Cu}_2\text{O}$  (111) at zone axis [011]. The  $d$ -spacing spots indexed as 1, 2 and 3 are determined as 0.221, 0.254 and 0.256 nm, respectively.

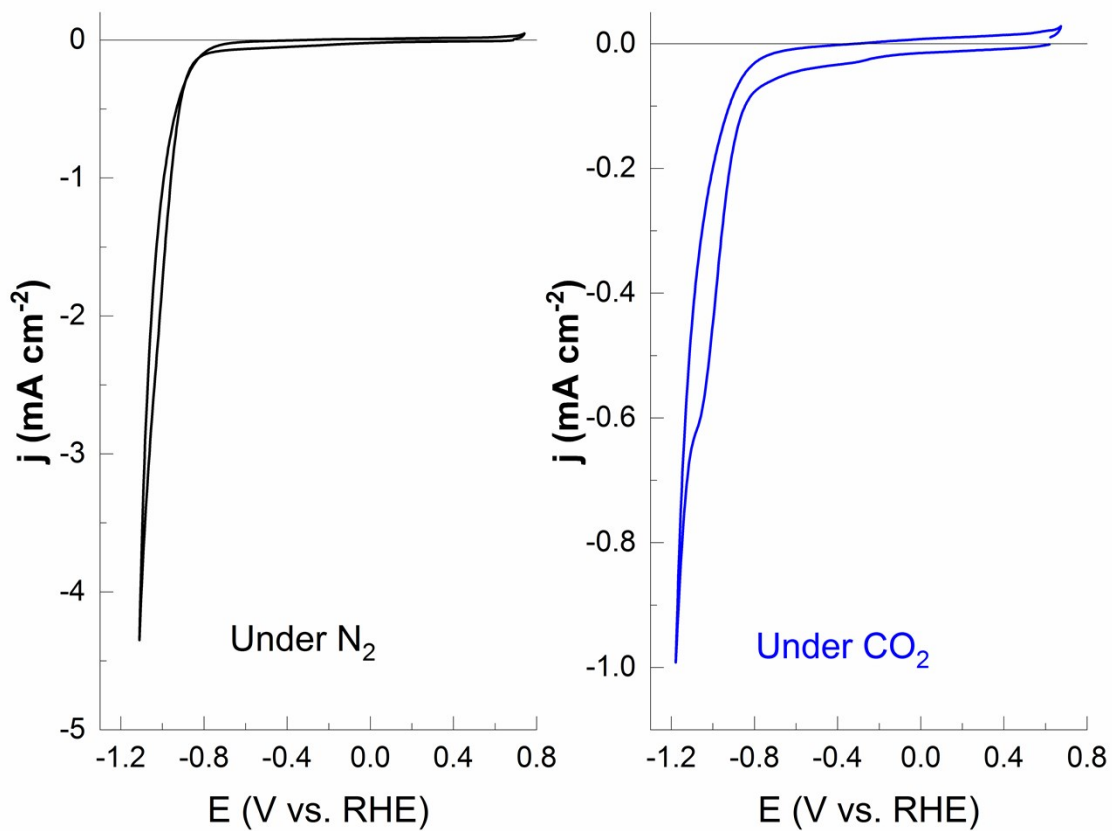

**Figure S4.** Cyclic voltammograms of metal-free mesoporous carbon material recorded at 50 mV s<sup>-1</sup> scan rate in 0.4 mol L<sup>-1</sup> KHCO<sub>3</sub> with 4.0 mM KCl.

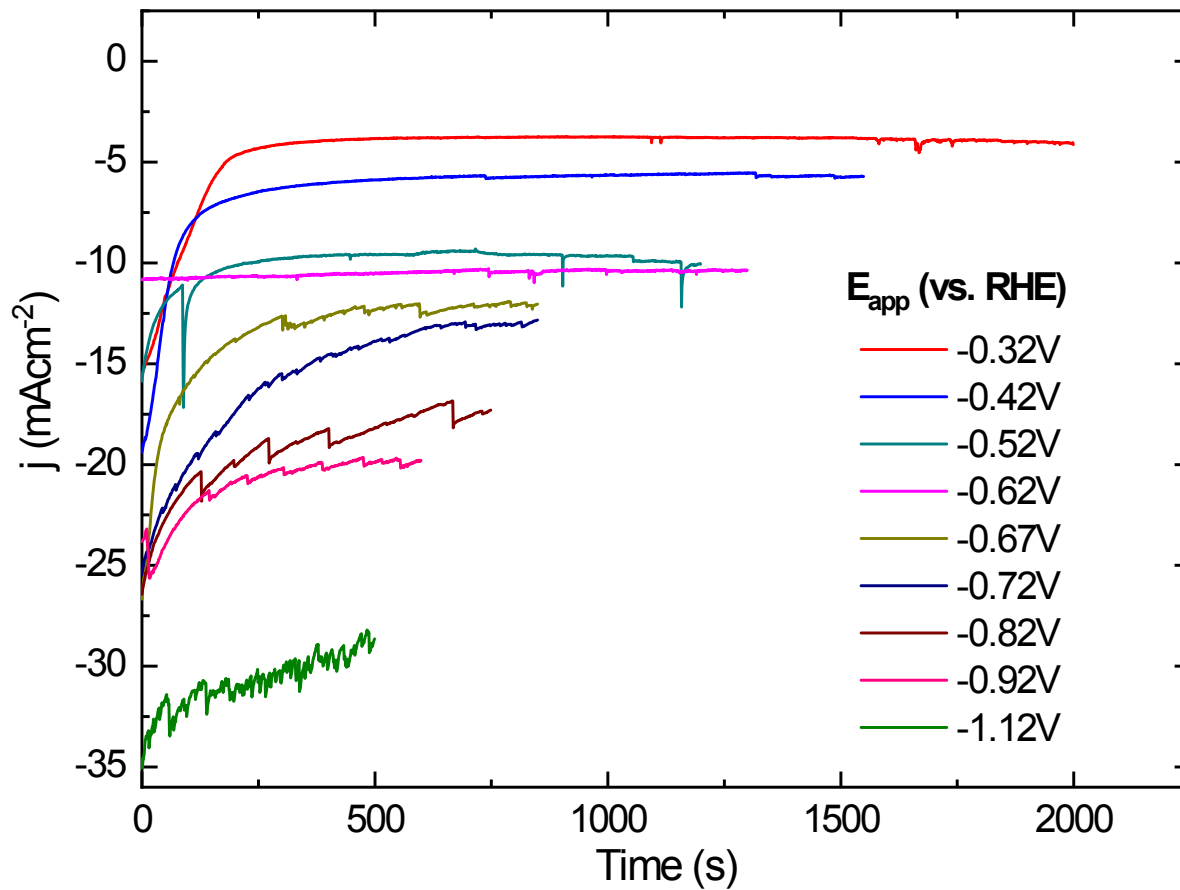

**Figure S5.** Chronoamperometry curves of Cu/C ex-Tannin catalyst at various electrode potentials in  $\text{CO}_2$ -saturated  $0.4 \text{ mol L}^{-1} \text{ KHCO}_3$  electrolyte containing  $4.0 \text{ mM KCl}$ .

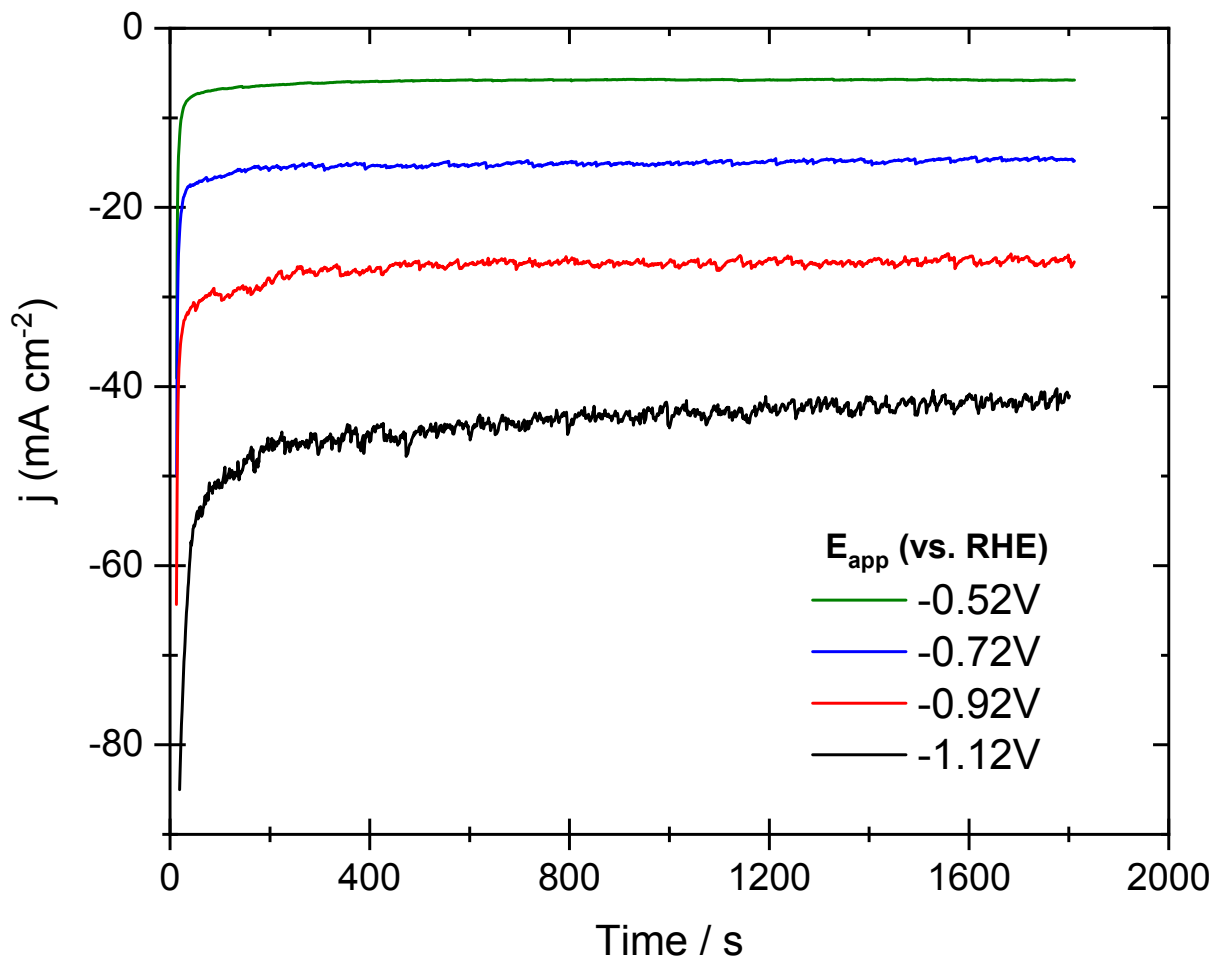

**Figure S6.** On-line DEMS measurements of chronoamperometry curves of Cu/C ex-Tannin catalyst at various electrode potentials in  $\text{CO}_2$ -saturated  $0.4 \text{ mol L}^{-1} \text{ KHCO}_3$  electrolyte containing  $4.0 \text{ mM KCl}$ .

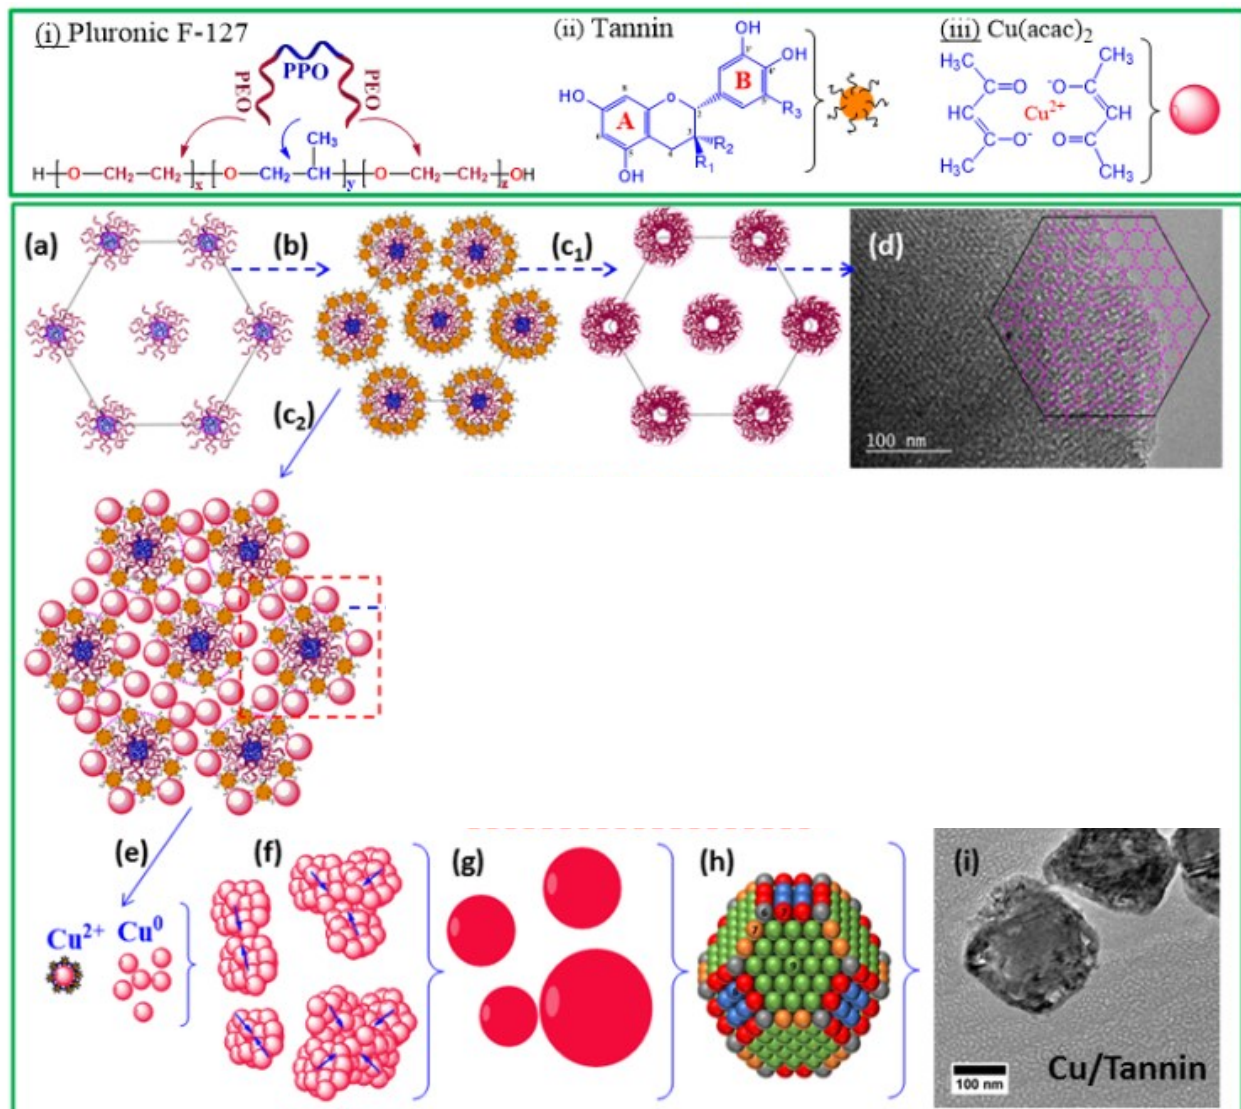

**Figure S7.** Schematic illustration of the one-pot soft templating Evaporation-Induced Self-Assembly (EISA) route for mesoporous carbon-embedded nanostructured copper material synthesis.



**Table S1.** Data obtained from the fixed-potential electrolysis, *in-situ*  $\mu$ -GC and HPLC analyses of CO<sub>2</sub> reduction using nanostructured Cu/C ex-Tannin porous electrodes.

| Electrode potential<br>E (V vs. RHE) | Current density<br> j  (mA cm <sup>-2</sup> ) | Coulombic Charge<br>(C) | Faradaic Efficiency (F.E %) |     |                |
|--------------------------------------|-----------------------------------------------|-------------------------|-----------------------------|-----|----------------|
|                                      |                                               |                         | HCOOH                       | CO  | H <sub>2</sub> |
| -0.32 V                              | 3.9                                           | 55.2                    | 11.6                        | 4.0 | 45.8           |
| -0.42 V                              | 5.7                                           | 61.9                    | 16.5                        | 5.4 | 55.1           |
| -0.52 V                              | 9.9                                           | 75.5                    | 24.8                        | 9.7 | 45.8           |
| -0.62 V                              | 10.4                                          | 62.2                    | 31.2                        | 5.6 | 47.2           |
| -0.67 V                              | 11.9                                          | 72.3                    | 17.5                        | 5.2 | 48.5           |
| -0.72 V                              | 13.0                                          | 76.0                    | 25.4                        | 4.7 | 56.2           |
| -0.82 V                              | 17.7                                          | 90.5                    | 19.4                        | 3.7 | 56.4           |
| -0.92 V                              | 19.8                                          | 79.0                    | 28.1                        | 4.4 | 52.1           |
| -1.12 V                              | 28.4                                          | 96.4                    | 18.4                        | 1.5 | 77.1           |
